# Supplementary material for: Multiple ETS Factors Participate in the Transcriptional Control of TERT Mutant Promoter in Thyroid Cancers
Source: MDPI journal article supplement (doi:10.3390/cancers14020357), 2022-01-12
Supplement: s1 [file s1]

**Supplementary Tables.**

**Supplementary Table S1.** List of short hairpin RNA (shRNA) clones.

| Clone ID (from GPP Web Portal) | Clone category | Target Sequence        | Vector backbone | Original Target Gene ID | Original Target Gene Symbol | Match Regions |
|--------------------------------|----------------|------------------------|-----------------|-------------------------|-----------------------------|---------------|
| TRCN0000017078                 | TRC 1.0        | CCGAGCTATGAGATATTACTA  | pLKO.1          | 26298                   | EHF                         | CDS           |
| TRCN0000013856                 | TRC 1.0        | CCTGCCGTAATTGTGGAACAT  | pLKO.1          | 1997                    | ELF1                        | 5UTR, CDS     |
| TRCN0000273855                 | TRC 2.0        | GTCTCCTGAGTTAGGTATAAA  | pLKO_TRC005     | 1998                    | ELF2                        | CDS           |
| TRCN0000013863                 | TRC 1.0        | CTCCCTAATTTATGTGCTATA  | pLKO.1          | 1999                    | ELF3                        | 3UTR          |
| TRCN0000013869                 | TRC 1.0        | CGCGGAAGTCTTACTCAATAT  | pLKO.1          | 2000                    | ELF4                        | CDS           |
| TRCN0000007450                 | TRC 1.0        | CCCAAGAGTAACTCTCATTAT  | pLKO.1          | 2002                    | ELK1                        | 3UTR          |
| TRCN0000329766                 | TRC 2.0        | ACTCGTCCTTCACCATTAATT  | pLKO_TRC005     | 2004                    | ELK3                        | CDS           |
| TRCN0000013886                 | TRC 1.0        | GCTTCTCTTACACAGCATTT   | pLKO.1          | 2005                    | ELK4                        | 3UTR, CDS     |
| TRCN0000013909                 | TRC 1.0        | CCTGCGCTATTACTATAACAA  | pLKO.1          | 2077                    | ERF                         | CDS           |
| TRCN0000013914                 | TRC 1.0        | GCTCATATCAAGGAAGCCTTA  | pLKO.1          | 2078                    | ERG                         | CDS           |
| TRCN0000005591                 | TRC 1.0        | CTGGAATTACTCAC TGATAAA | pLKO.1          | 2113                    | ETS1                        | CDS           |
| TRCN0000233984                 | TRC 2.0        | GAGCAAGGCAAAC CAGTTATT | pLKO_TRC005     | 23872                   | Ets2                        | CDS           |
| TRCN0000013918                 | TRC 1.0        | GCCGACTAAGAGAGATTGTAA  | pLKO.1          | 2114                    | ETS2                        | 3UTR          |
| TRCN0000013923                 | TRC 1.0        | GTGGGAGTAATCTAAACATTT  | pLKO.1          | 2115                    | ETV1                        | 3UTR          |
| TRCN0000013928                 | TRC 1.0        | CCTCTTGACTTTCC TGGTTAT | pLKO.1          | 2117                    | ETV3                        | 3UTR          |
| TRCN0000013934                 | TRC 1.0        | GCAGAGCTTTAAGCAAGAATA  | pLKO.1          | 2118                    | ETV4                        | CDS           |
| TRCN0000273931                 | TRC 2.0        | GAGCGATACGTCTACAAATTT  | pLKO_TRC005     | 2119                    | ETV5                        | CDS           |
| TRCN0000003852                 | TRC 1.0        | AGGAGCTGGATGACAAATAT   | pLKO.1          | 2120                    | ETV6                        | CDS           |
| TRCN0000016743                 | TRC 1.0        | CCAGATGTGAAGCTCAAATTA  | pLKO.1          | 51513                   | ETV7                        | 5UTR, CDS     |
| TRCN0000005323                 | TRC 1.0        | CCCATGAACTACAACAGCTAT  | pLKO.1          | 2313                    | FLI1                        | CDS           |
| TRCN0000304469                 | TRC 2.0        | AGCTTAGTGTACAGGTAATTT  | pLKO_TRC005     | 14390                   | Gabpa                       | CDS           |
| TRCN0000304508                 | TRC 2.0        | ATGAACCAATAGGCAATTTAA  | pLKO_TRC005     | 14390                   | Gabpa                       | CDS           |

Abbreviations: GPP= Genetic Perturbation Platform; CDS= coding DNA sequence; UTR= untranslated region

**Supplementary Table S2.** List of primers used for quantitative PCR.

| qPCR Primer List 5' -> 3' |                         |                         |
|---------------------------|-------------------------|-------------------------|
| Target Gene               | Forward                 | Reverse                 |
| <i>ETS1</i>               | TACACAGGCAGTGGACCATC    | CCCCGCTGTCCTGTGGATG     |
| <i>ETS2</i>               | CCCCTGTGGCTAACAGTTACA   | AGGTAGCTTTTAAGGCTTGACTC |
| <i>ELF3</i>               | CAACTATGGGGCCAAAAGAA    | CAACCCTCAGTTCGACTCT     |
| <i>ELF1</i>               | TGTCCAACAGAACGACCTAGT   | GGCAGGAAAAATAGCTGGATCAC |
| <i>ELF2</i>               | AAACTGTAGTGGAGGTGTCAACT | CATGGCTATCTGGTGATGTTGG  |
| <i>ETV7</i>               | TCAGTGCTCCTTGATACCC     | GCCCCGGTTCCTTCTTAAT     |
| <i>ELF4</i>               | CCTGATCTTTGAGTTCGCAAGC  | AGTCCCGAGTACAGATGCAGT   |
| <i>ETV1</i>               | GGCCCCAGGCAGTTTTATGAT   | GATCCTCGCCGTGGTATGT     |
| <i>ETV3</i>               | GGTGGAGGGTATCAGTTTCCT   | TGATGAATGGGTAGTTGGGCAT  |
| <i>ETV4</i>               | CAGTGCCTTTACTCCAGTGCC   | CTCAGGAAATTCCGTTGCTCT   |
| <i>ELK1</i>               | TCCCTGCTTCCTACGCATACA   | GCTGCCACTGGATGGAAACT    |
| <i>ETV5</i>               | CAGTCAACTTCAAGAGGCTTGG  | TGCTCATGGCTACAAGACGAC   |
| <i>ETV6</i>               | CCCATTGGGAGAATAGCAGA    | CAGGGCTCTGGACATTTTCT    |
| <i>ERF</i>                | ATTCATTGATGTGGGGTTGG    | AGATGAAGAGCAGGCTGGTG    |
| <i>EHF</i>                | CCACCAGTCACCTTCCTGTT    | GAGCCACTGCCTCTGATTTC    |
| <i>ELK3</i>               | ATCTGCTGGACCTCGAACGA    | TTCTGCCCCGATCACCTTCTTG  |
| <i>ELK4</i>               | ACTCAGCCGAGCCCTCAG      | GGTGGCTTTTTGGAAGGTG     |
| <i>GABPA</i>              | AAGAACGCCTTGGGATACCCT   | GTGAGGTCTATATCGGTCATGCT |
| <i>ERG</i>                | TGGCTCAAGGAACTCTCCTG    | ATAACTCTGCGCTCGTTCGT    |
| <i>FLI1</i>               | ATGACCACCAACGAGAGGAG    | GTTCTTGCCATCCATGTTC     |
| <i>ACTB</i>               | CTCTTCCAGCCTTCCTTCCT    | AGCACTGTGTTGGCGTACAG    |
